# Supplementary material for: Co-luminescence in a zero-dimensional organic–inorganic hybrid antimony halide with multiple coordination units
Source: Royal Society of Chemistry journal article supplement (doi:10.1039/d0dt04388e), 2021-01-01
Supplement: d0dt04388e1.pdf [file d0dt04388e1.pdf]

Electronic Supporting Information (ESI) for

**Co-luminescence in a zero-dimensional organic–inorganic hybrid  
antimony halide with multiple coordination units**

Zhi-Zhuan Zhang,<sup>a,b</sup> Jian-Ce Jin,<sup>b,c</sup> Liao-Kuo Gong,<sup>b,c</sup> Yang-Peng Lin,<sup>a</sup> Ke-Zhao Du,<sup>a,\*</sup>  
and Xiao-Ying Huang<sup>b,\*</sup>

<sup>a</sup> College of Chemistry and Materials Science, Fujian Provincial Key Laboratory of Polymer Materials, Fujian Normal University, Fuzhou 350007, China. E-mail: [duke@fjnu.edu.cn](mailto:duke@fjnu.edu.cn)

<sup>b</sup> State Key Laboratory of Structural Chemistry, Fujian Institute of Research on the Structure of Matter, Chinese Academy of Sciences, Fuzhou, Fujian, 350002, P.R. China. E-mail: [xyhuang@fjirsm.ac.cn](mailto:xyhuang@fjirsm.ac.cn)

<sup>c</sup> University of Chinese Academy of Sciences, Beijing, 100049, P.R. China.

**Table S1.** Crystal data and structure refinement for **1**.

| Compound                                                                      | [Emim] <sub>8</sub> [SbCl <sub>6</sub> ] <sub>2</sub> [SbCl <sub>5</sub> ]       |
|-------------------------------------------------------------------------------|----------------------------------------------------------------------------------|
| Empirical formula                                                             | C <sub>48</sub> H <sub>88</sub> N <sub>16</sub> Cl <sub>17</sub> Sb <sub>3</sub> |
| Formula Mass                                                                  | 1857.24                                                                          |
| Crystal system                                                                | Tetragonal                                                                       |
| Space group                                                                   | <i>P4/n</i>                                                                      |
| <i>a</i> /Å                                                                   | 25.1212(6)                                                                       |
| <i>b</i> /Å                                                                   | 25.1212(6)                                                                       |
| <i>c</i> /Å                                                                   | 12.0964(6)                                                                       |
| <i>α</i> /°                                                                   | 90                                                                               |
| <i>β</i> /°                                                                   | 90                                                                               |
| <i>γ</i> /°                                                                   | 90                                                                               |
| <i>V</i> /Å <sup>3</sup>                                                      | 7633.7(5)                                                                        |
| <i>Z</i>                                                                      | 4                                                                                |
| <i>T</i> /K                                                                   | 100(2)                                                                           |
| <i>λ</i> /Å                                                                   | 0.71073                                                                          |
| <i>F</i> (000)                                                                | 3720                                                                             |
| <i>ρ</i> <sub>calcd</sub> /g cm <sup>-3</sup>                                 | 1.616                                                                            |
| <i>μ</i> /mm <sup>-1</sup>                                                    | 1.693                                                                            |
| Measured refls.                                                               | 31350                                                                            |
| Independent refls.                                                            | 11049                                                                            |
| No. of parameters                                                             | 487                                                                              |
| <i>R</i> <sub>int</sub>                                                       | 0.0411                                                                           |
| <i>R</i> <sub>1</sub> ( <i>I</i> > 2σ( <i>I</i> )) <sup>a</sup>               | 0.0370                                                                           |
| <i>wR</i> ( <i>F</i> <sup>2</sup> ) ( <i>I</i> > 2σ( <i>I</i> )) <sup>b</sup> | 0.0700                                                                           |
| GOF                                                                           | 1.037                                                                            |
| CCDC #                                                                        | 2051595                                                                          |

[a]  $R_1 = \sum \|F_o\| - \|F_c\| / \sum \|F_o\|$ , [b]  $wR_2 = [\sum w(F_o^2 - F_c^2)^2 / \sum w(F_o^2)^2]^{1/2}$ .

**Table S2** Selected bond lengths (Å) and bond angles (°) for **1**.

| bond           | lengths (Å) | bonds                   | angles (°) |
|----------------|-------------|-------------------------|------------|
| Sb(1)-Cl(3)    | 2.5767(8)   | Cl(3)-Sb(1)-Cl(1)       | 90.93(2)   |
| Sb(1)-Cl(1)    | 2.6188(7)   | Cl(3)-Sb(1)-Cl(5)       | 86.83(2)   |
| Sb(1)-Cl(5)    | 2.6405(8)   | Cl(1)-Sb(1)-Cl(5)       | 89.24(2)   |
| Sb(1)-Cl(4)    | 2.6715(8)   | Cl(3)-Sb(1)-Cl(4)       | 89.70(3)   |
| Sb(1)-Cl(6)    | 2.6930(7)   | Cl(1)-Sb(1)-Cl(4)       | 89.00(3)   |
| Sb(1)-Cl(2)    | 2.7288(8)   | Cl(5)-Sb(1)-Cl(4)       | 176.08(3)  |
| Sb(2)-Cl(8)    | 2.3957(13)  | Cl(3)-Sb(1)-Cl(6)       | 91.69(2)   |
| Sb(2)-Cl(7)#1  | 2.6107(7)   | Cl(1)-Sb(1)-Cl(6)       | 176.89(2)  |
| Sb(2)-Cl(7)#2  | 2.6107(7)   | Cl(5)-Sb(1)-Cl(6)       | 92.59(2)   |
| Sb(2)-Cl(7)#3  | 2.6107(7)   | Cl(4)-Sb(1)-Cl(6)       | 89.32(3)   |
| Sb(2)-Cl(7)    | 2.6107(7)   | Cl(3)-Sb(1)-Cl(2)       | 178.79(2)  |
| Sb(3)-Cl(9)    | 2.4048(14)  | Cl(1)-Sb(1)-Cl(2)       | 90.11(2)   |
| Sb(3)-Cl(10)#2 | 2.6158(8)   | Cl(5)-Sb(1)-Cl(2)       | 92.57(2)   |
| Sb(3)-Cl(10)#3 | 2.6158(8)   | Cl(4)-Sb(1)-Cl(2)       | 90.94(3)   |
| Sb(3)-Cl(10)   | 2.6158(8)   | Cl(6)-Sb(1)-Cl(2)       | 87.29(2)   |
| Sb(3)-Cl(10)#1 | 2.6158(8)   | Cl(8)-Sb(2)-Cl(7)#1     | 88.124(17) |
|                |             | Cl(8)-Sb(2)-Cl(7)#2     | 88.124(17) |
|                |             | Cl(7)#1-Sb(2)-Cl(7)#2   | 89.939(1)  |
|                |             | Cl(8)-Sb(2)-Cl(7)#3     | 88.124(17) |
|                |             | Cl(7)#1-Sb(2)-Cl(7)#3   | 176.25(3)  |
|                |             | Cl(7)#2-Sb(2)-Cl(7)#3   | 89.938(2)  |
|                |             | Cl(8)-Sb(2)-Cl(7)       | 88.124(17) |
|                |             | Cl(7)#1-Sb(2)-Cl(7)     | 89.939(2)  |
|                |             | Cl(7)#2-Sb(2)-Cl(7)     | 176.25(3)  |
|                |             | Cl(7)#3-Sb(2)-Cl(7)     | 89.939(1)  |
|                |             | Cl(9)-Sb(3)-Cl(10)#2    | 87.818(18) |
|                |             | Cl(9)-Sb(3)-Cl(10)#3    | 87.818(18) |
|                |             | Cl(10)#2-Sb(3)-Cl(10)#3 | 89.917(1)  |
|                |             | Cl(9)-Sb(3)-Cl(10)      | 87.818(18) |
|                |             | Cl(10)#2-Sb(3)-Cl(10)   | 175.64(4)  |
|                |             | Cl(10)#3-Sb(3)-Cl(10)   | 89.915(2)  |
|                |             | Cl(9)-Sb(3)-Cl(10)#1    | 87.818(18) |
|                |             | Cl(10)#2-Sb(3)-Cl(10)#1 | 89.919(2)  |
|                |             | Cl(10)#3-Sb(3)-Cl(10)#1 | 175.64(4)  |
|                |             | Cl(10)-Sb(3)-Cl(10)#1   | 89.917(1)  |

Symmetry transformations used to generate equivalent atoms: #1,  $-y+3/2, x, z$ ; #2  $-x+3/2, -y+3/2, z$   
#3  $y, -x+3/2, z$

**Table S3** Hydrogen bonding data for **1**.

| D-H...A                 | D-H (Å) | H...A (Å) | D...A (Å) | <(DHA) (°) |
|-------------------------|---------|-----------|-----------|------------|
| C(1)-H(1A)···Cl(5)      | 0.95    | 2.77      | 3.689(3)  | 162.6      |
| C(2)-H(2A)···Cl(2)#4    | 0.95    | 2.90      | 3.822(3)  | 164.1      |
| C(3)-H(3A)···Cl(1)#5    | 0.95    | 2.71      | 3.540(3)  | 146.0      |
| C(4)-H(4B)···Cl(1)#5    | 0.98    | 2.72      | 3.649(3)  | 157.4      |
| C(4)-H(4C)···Cl(4)#6    | 0.98    | 2.78      | 3.695(3)  | 156.0      |
| C(5)-H(5B)···Cl(6)      | 0.99    | 2.82      | 3.682(3)  | 146.3      |
| C(8)-H(8A)···Cl(7)#3    | 0.95    | 2.81      | 3.664(3)  | 150.3      |
| C(9)-H(9A)···Cl(6)#7    | 0.95    | 2.57      | 3.408(3)  | 147.3      |
| C(10)-H(10A)···Cl(5)#3  | 0.98    | 2.71      | 3.653(4)  | 162.3      |
| C(10)-H(10B)···Cl(2)#7  | 0.98    | 2.85      | 3.625(3)  | 136.1      |
| C(10)-H(10C)···Cl(2)#3  | 0.98    | 2.81      | 3.406(4)  | 120.1      |
| C(11)-H(11A)···Cl(7)    | 0.99    | 2.72      | 3.661(4)  | 158.2      |
| C(11)-H(11B)···Cl(10)#1 | 0.99    | 2.77      | 3.596(3)  | 141.5      |
| C(13)-H(13A)···Cl(1)#8  | 0.95    | 2.97      | 3.735(3)  | 138.8      |
| C(13)-H(13A)···Cl(7)#8  | 0.95    | 2.87      | 3.474(3)  | 122.4      |
| C(15)-H(15A)···Cl(4)#7  | 0.95    | 2.85      | 3.423(3)  | 119.7      |
| C(15)-H(15A)···Cl(6)#7  | 0.95    | 2.81      | 3.654(3)  | 148.9      |
| C(16)-H(16A)···Cl(1)#8  | 0.98    | 2.91      | 3.688(4)  | 136.5      |
| C(16)-H(16B)···Cl(2)#8  | 0.98    | 2.72      | 3.493(3)  | 136.0      |
| C(16)-H(16C)···Cl(2)#7  | 0.98    | 2.65      | 3.604(4)  | 163.5      |
| C(17)-H(17A)···Cl(10)   | 0.99    | 2.86      | 3.441(3)  | 117.9      |
| C(17)-H(17A)···Cl(10)#1 | 0.99    | 2.84      | 3.683(3)  | 143.3      |
| C(20)-H(20A)···Cl(3)#7  | 0.95    | 2.76      | 3.645(4)  | 154.9      |
| C(20)-H(20A)···Cl(6)#7  | 0.95    | 2.82      | 3.384(4)  | 118.9      |
| C(21)-H(21A)···Cl(4)#6  | 0.95    | 2.57      | 3.406(4)  | 147.2      |
| C(22)-H(22A)···Cl(5)    | 0.98    | 2.84      | 3.74(2)   | 152.8      |
| C(22)-H(22B)···Cl(2)#4  | 0.98    | 2.79      | 3.519(15) | 131.4      |
| C(23)-H(23B)···Cl(3)#6  | 0.99    | 2.79      | 3.61(2)   | 139.7      |
| C(24)-H(24C)···Cl(3)#7  | 0.98    | 2.98      | 3.867(13) | 150.4      |
| C(22B)-H(22D)···Cl(4)#7 | 0.98    | 2.83      | 3.81(3)   | 173.1      |
| C(23B)-H(23C)···Cl(5)   | 0.99    | 2.89      | 3.68(3)   | 137.9      |
| C(23B)-H(23D)···Cl(2)#4 | 0.99    | 2.85      | 3.466(14) | 121.3      |
| C(22C)-H(22H)···Cl(5)   | 0.98    | 2.79      | 3.70(5)   | 155.6      |
| C(22C)-H(22I)···Cl(2)#4 | 0.98    | 2.82      | 3.69(4)   | 147.2      |
| C(24C)-H(24G)···Cl(3)#6 | 0.98    | 2.99      | 3.46(2)   | 111.1      |
| C(24C)-H(24H)···Cl(4)#7 | 0.98    | 2.52      | 3.45(3)   | 158.5      |

Symmetry transformations used to generate equivalent atoms:

#1 -y+3/2,x,z; #2 -x+3/2,-y+3/2,z; #3 y,-x+3/2,z; #4 -x+2,-y+1,-z+1; #5 y+1/2,-x+1,-z+1; #6 x,y,z+1; #7 -y+1,x-1/2,-z+1; #8 y,-x+3/2,z+1

**Table S4** Element analysis of C, H and N for **1**.

| Elements    | C     | H    | N     |
|-------------|-------|------|-------|
| Calculation | 31.04 | 4.78 | 12.07 |
| Found       | 30.40 | 4.80 | 11.77 |

**Table S5** Summary of Sb...Sb distances and PLQYs for various hybrid chloroantimonates.

| Compounds                                                                       | Two shortest Sb...Sb distances (Å) |        | PLQY (%) | Ref       |
|---------------------------------------------------------------------------------|------------------------------------|--------|----------|-----------|
| Rb <sub>7</sub> (SbCl <sub>6</sub> )(Sb <sub>2</sub> Cl <sub>10</sub> )         | 4.527                              | 4.532  | 3.8      | 1         |
| [Emim] <sub>8</sub> [SbCl <sub>6</sub> ] <sub>2</sub> [SbCl <sub>5</sub> ]      | 5.932                              | 6.164  | 11.2     | This work |
| (C <sub>6</sub> N <sub>2</sub> H <sub>16</sub> ) <sub>2</sub> SbCl <sub>5</sub> | 4.337                              | 7.465  | 25.3     | 2         |
| (Bmim) <sub>2</sub> SbCl <sub>5</sub>                                           | 8.503                              | 8.821  | 86.3     | 3         |
| (C <sub>9</sub> NH <sub>20</sub> ) <sub>2</sub> SbCl <sub>5</sub>               | 8.229                              | 8.756  | 98       | 4         |
| (TEBA) <sub>2</sub> SbCl <sub>5</sub>                                           | 8.670                              | 9.254  | 98       | 5         |
| (TTA) <sub>2</sub> SbCl <sub>5</sub>                                            | 8.941                              | 9.494  | 86       | 5         |
| (C@Cs) <sub>2</sub> SbCl <sub>5</sub>                                           | 8.536                              | 9.362  | 89       | 6         |
| (Bzmim) <sub>2</sub> SbCl <sub>5</sub>                                          | 8.892                              | 9.071  | 22.3     | 7         |
| (Bzmim) <sub>3</sub> SbCl <sub>6</sub>                                          | 9.513                              | 9.743  | 87.5     | 7         |
| (Ph <sub>4</sub> P) <sub>2</sub> SbCl <sub>5</sub>                              | 10.006                             | 10.015 | 87       | 8         |
| (C@Rb) <sub>2</sub> SbCl <sub>5</sub>                                           | 10.397                             | 10.468 | 75       | 6         |
| (PPN) <sub>2</sub> SbCl <sub>5</sub>                                            | 11.042                             | 12.191 | 98.1     | 9         |

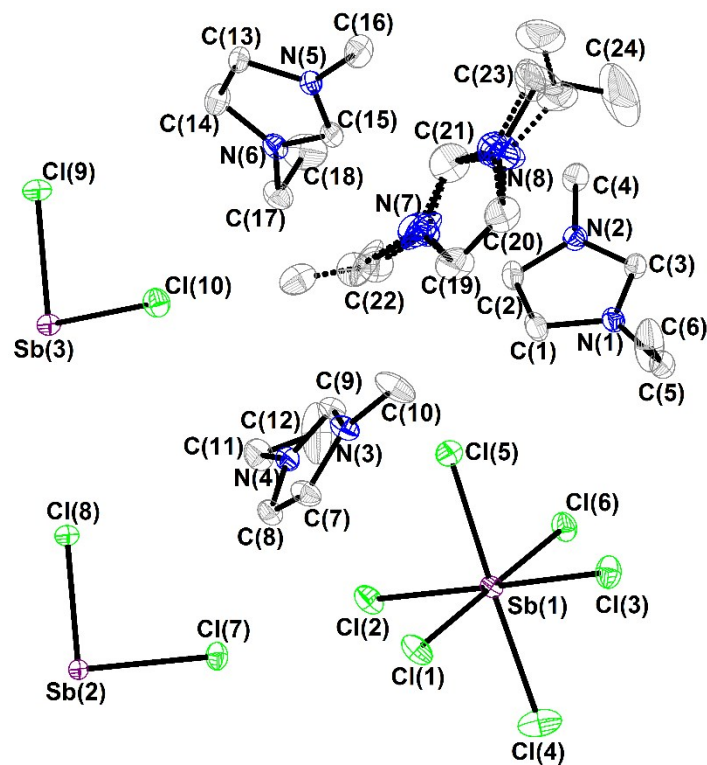

**Fig. S1** ORTEP drawing (50% ellipsoid probability) of the asymmetric unit of **1**. Hydrogen atoms are omitted for clarity.

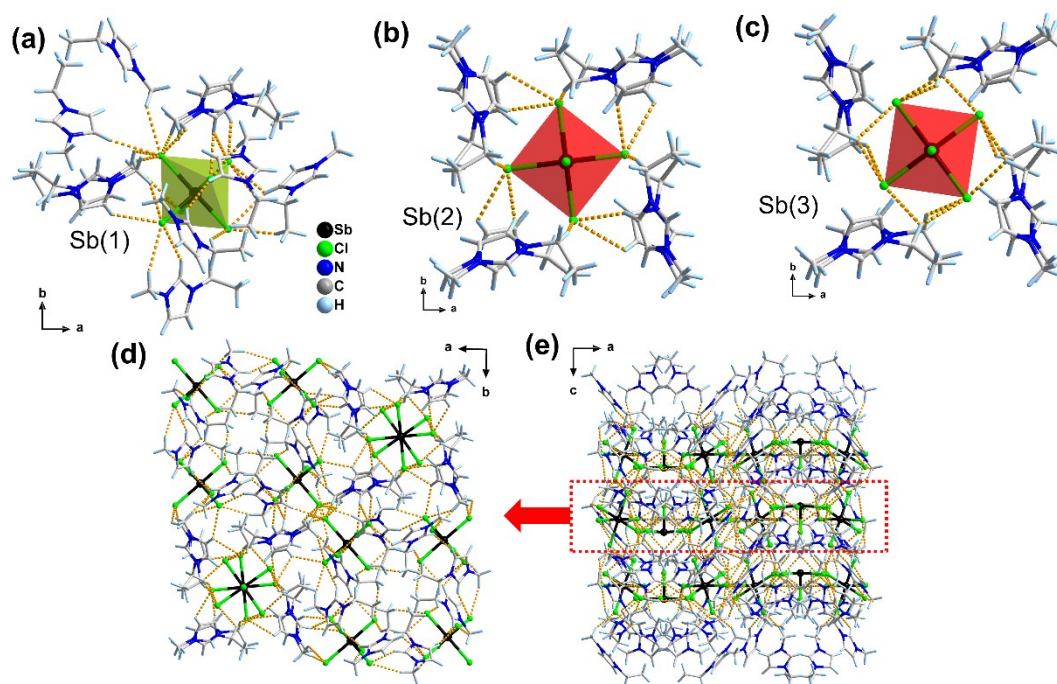

**Fig. S2** Diagrams showing hydrogen bonds among the organic cations and  $[\text{Sb}(1)\text{Cl}_6]^{3-}$  (a),  $[\text{Sb}(2)\text{Cl}_5]^{2-}$  (b), and  $[\text{Sb}(3)\text{Cl}_5]^{2-}$  (c) in **1**. (d) and (e) show the two- and three-dimensional supramolecular network, respectively, considering various hydrogen bonds in **1**.

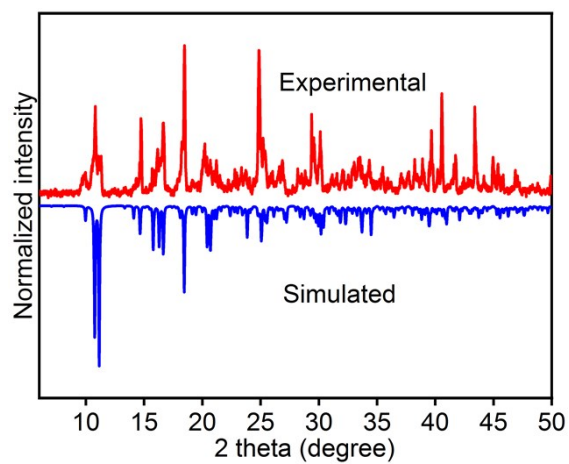

**Fig. S3** PXRD patterns of **1**.

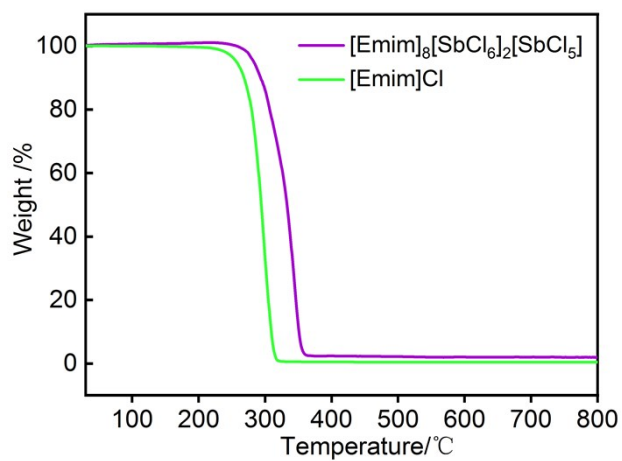

**Fig. S4** TG curves for **1** and [Emim]Cl.

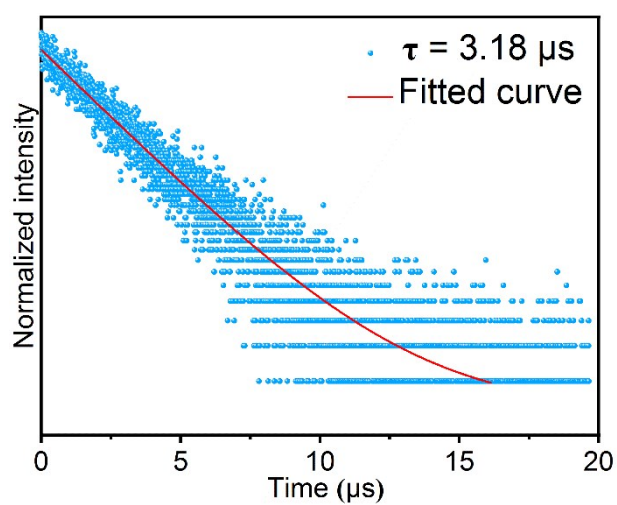

**Fig. S5** PL lifetime curve and its fitted curve for **1** measured at 77K.

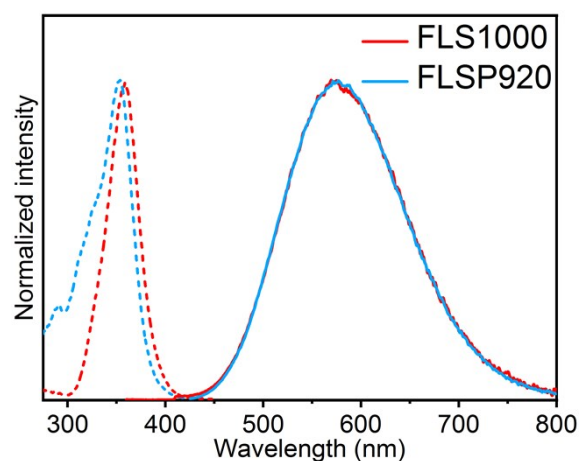

**Fig. S6** The PLE and PL of **1** measured on FLSP920 and FLS1000 fluorescence spectrometer.

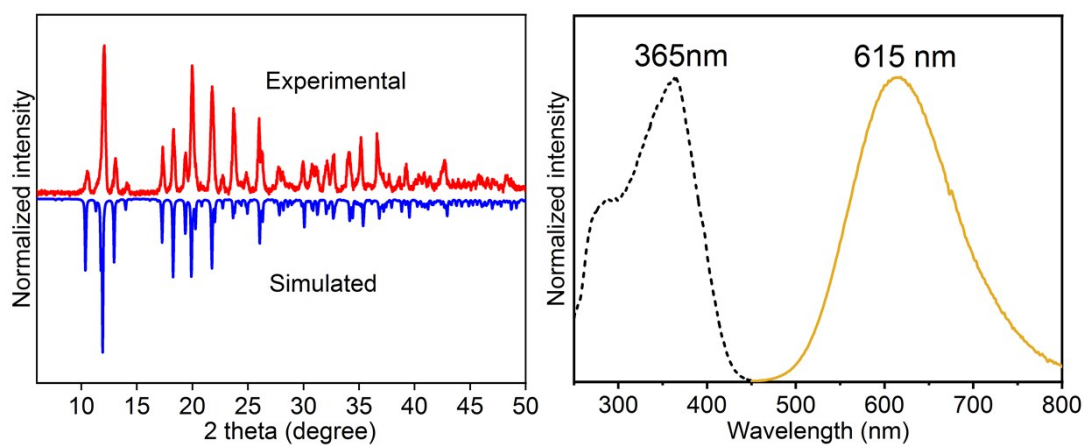

**Fig. S7** PXR patterns of  $[\text{Bmim}]_2\text{SbCl}_5$  (left) and its PLE and PL spectra measured on FLSP920 (right).

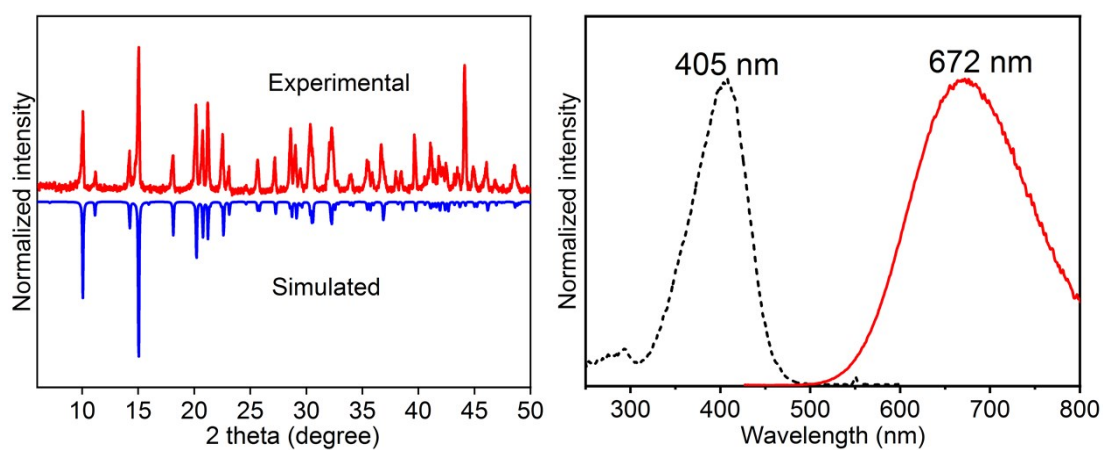

**Fig. S8** PXR patterns of  $[\text{Bzmim}]_2\text{SbCl}_5$  (left) and its PLE and PL spectra measured on FLSP920 (right).



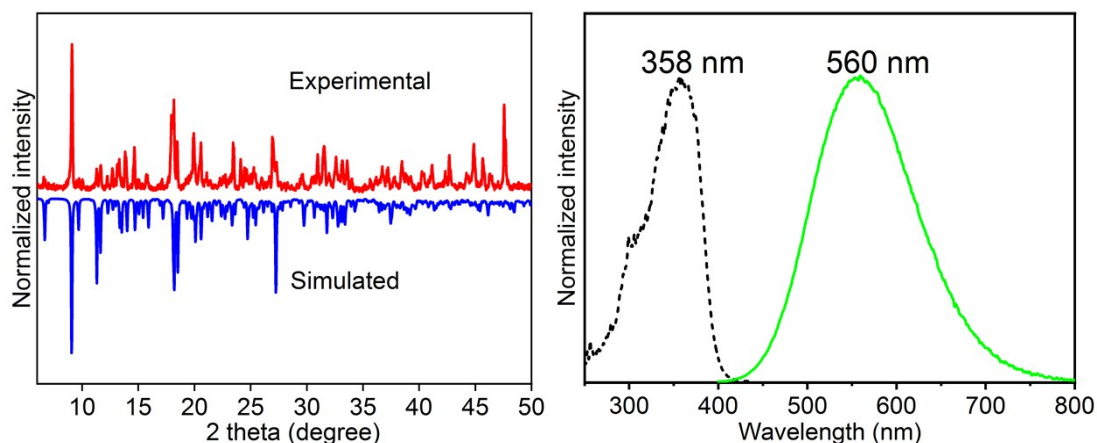

**Fig. S9** PXRD patterns of  $[\text{Bzmim}]_3\text{SbCl}_6$  (left) and its PLE and PL spectra measured on FLSP920 (right).

## References

1. B. M. Benin, K. M. McCall, M. Worle, V. Morad, M. Aebli, S. Yakunin, Y. Shynkarenko and M. V. Kovalenko, *Angew. Chem.-Int. Ed.*, 2020, **59**, 14490-14497.
2. G. M. Song, M. Z. Li, S. Z. Zhang, N. Z. Wang, P. F. Gong, Z. G. Xia and Z. S. Lin, *Adv. Funct. Mater.*, 2020, **30**, 2002468.
3. Z. P. Wang, J. Y. Wang, J. R. Li, M. L. Feng, G. D. Zou and X. Y. Huang, *Chem. Commun.*, 2015, **51**, 3094-3097.
4. C. K. Zhou, H. R. Lin, Y. Tian, Z. Yuan, R. Clark, B. Chen, L. J. van de Burgt, J. C. Wang, Y. Zhou, K. Hanson, Q. J. Meisner, J. Neu, T. Besara, T. Siegrist, E. Lambers, P. Djurovich and B. W. Ma, *Chem. Sci.*, 2018, **9**, 586-593.
5. Z. Y. Li, Y. Li, P. Liang, T. L. Zhou, L. Wang and R. J. Xie, *Chem. Mater.*, 2019, **31**, 9363-9371.
6. V. Morad, S. Yakunin and M. V. Kovalenko, *ACS Materials Lett.*, 2020, **2**, 845-852.
7. Z. P. Wang, Z. Z. Zhang, L. Q. Tao, N. N. Shen, B. Hu, L. K. Gong, J. R. Li, X. P. Chen and X. Y. Huang, *Angew. Chem.-Int. Ed.*, 2019, **58**, 9974-9978.
8. C. K. Zhou, M. Worku, J. Neu, H. R. Lin, Y. Tian, S. J. Lee, Y. Zhou, D. Han, S. Y. Chen, A. Hao, P. I. Djurovich, T. Siegrist, M. H. Du and B. W. Ma, *Chem. Mater.*, 2018, **30**, 2374-2378.
9. Q. Q. He, C. K. Zhou, L. J. Xu, S. J. Lee, X. S. Lin, J. Neu, M. Worku, M. Chaaban and B. W. Ma, *ACS Materials Lett.*, 2020, **2**, 633-638.
